# Supplementary material
Source: Springer Nature journal article supplement (https://www.springermedizin.de/resource/supplementary/12885_2008_1386_MOESM4_ESM.pdf/9472982)

**A**

anti-CtBP1

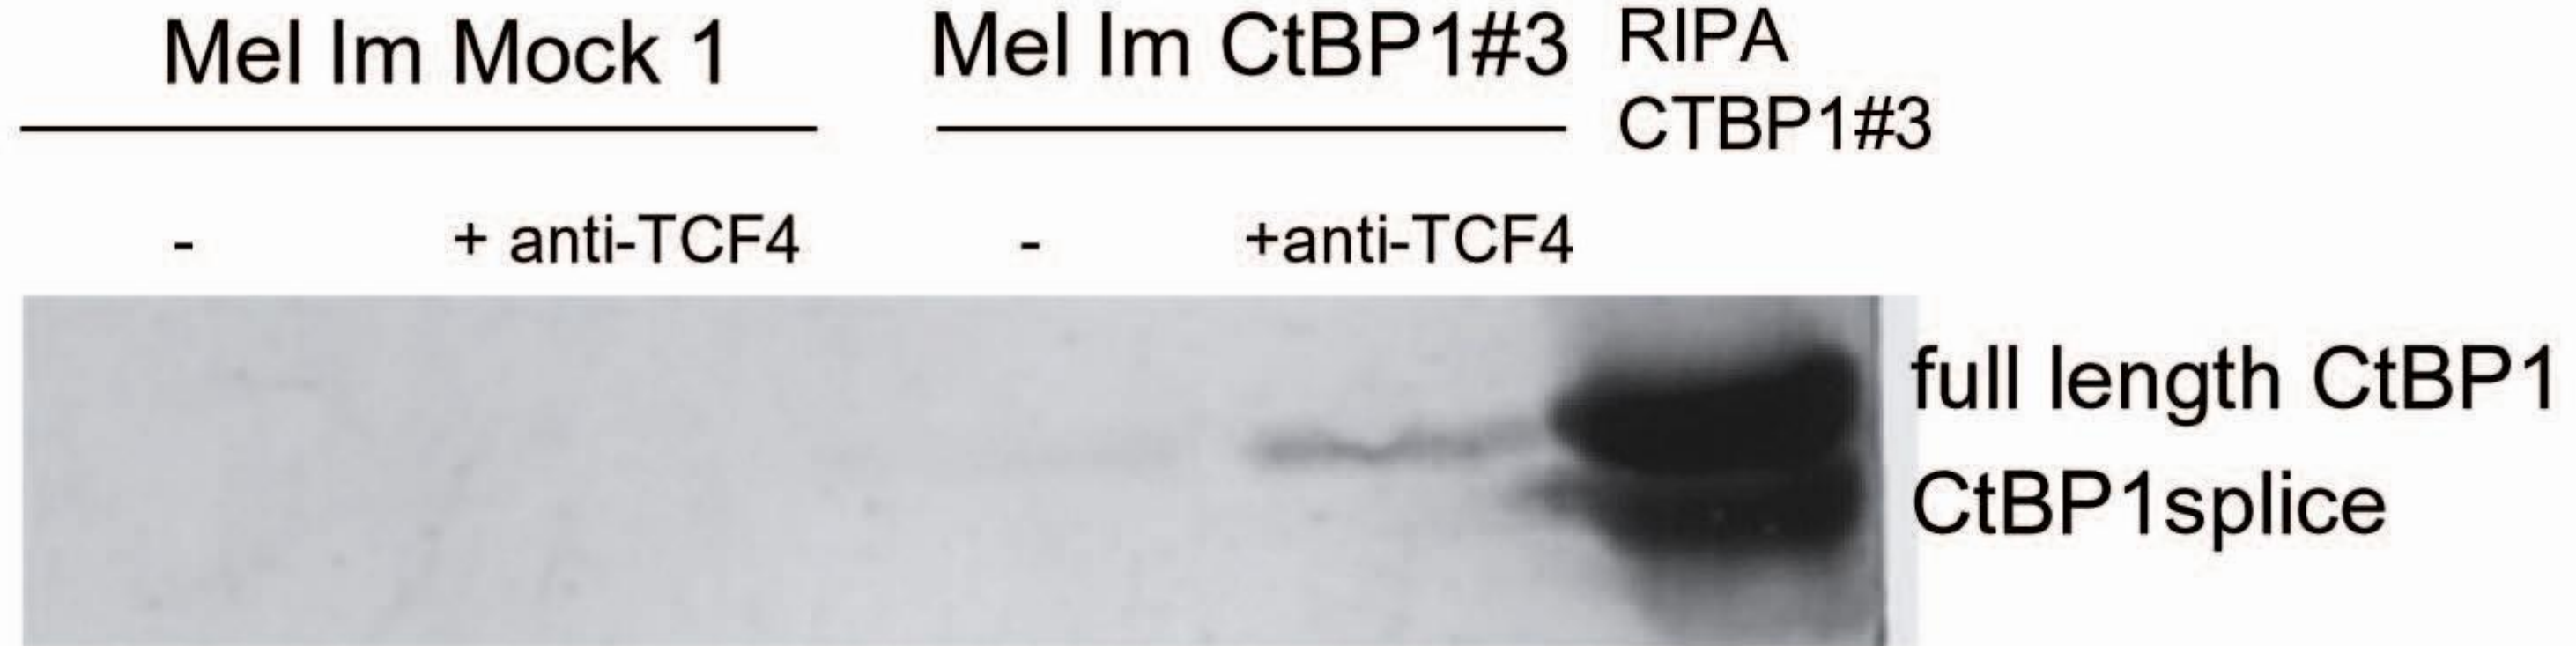**B**

anti-CtBP1

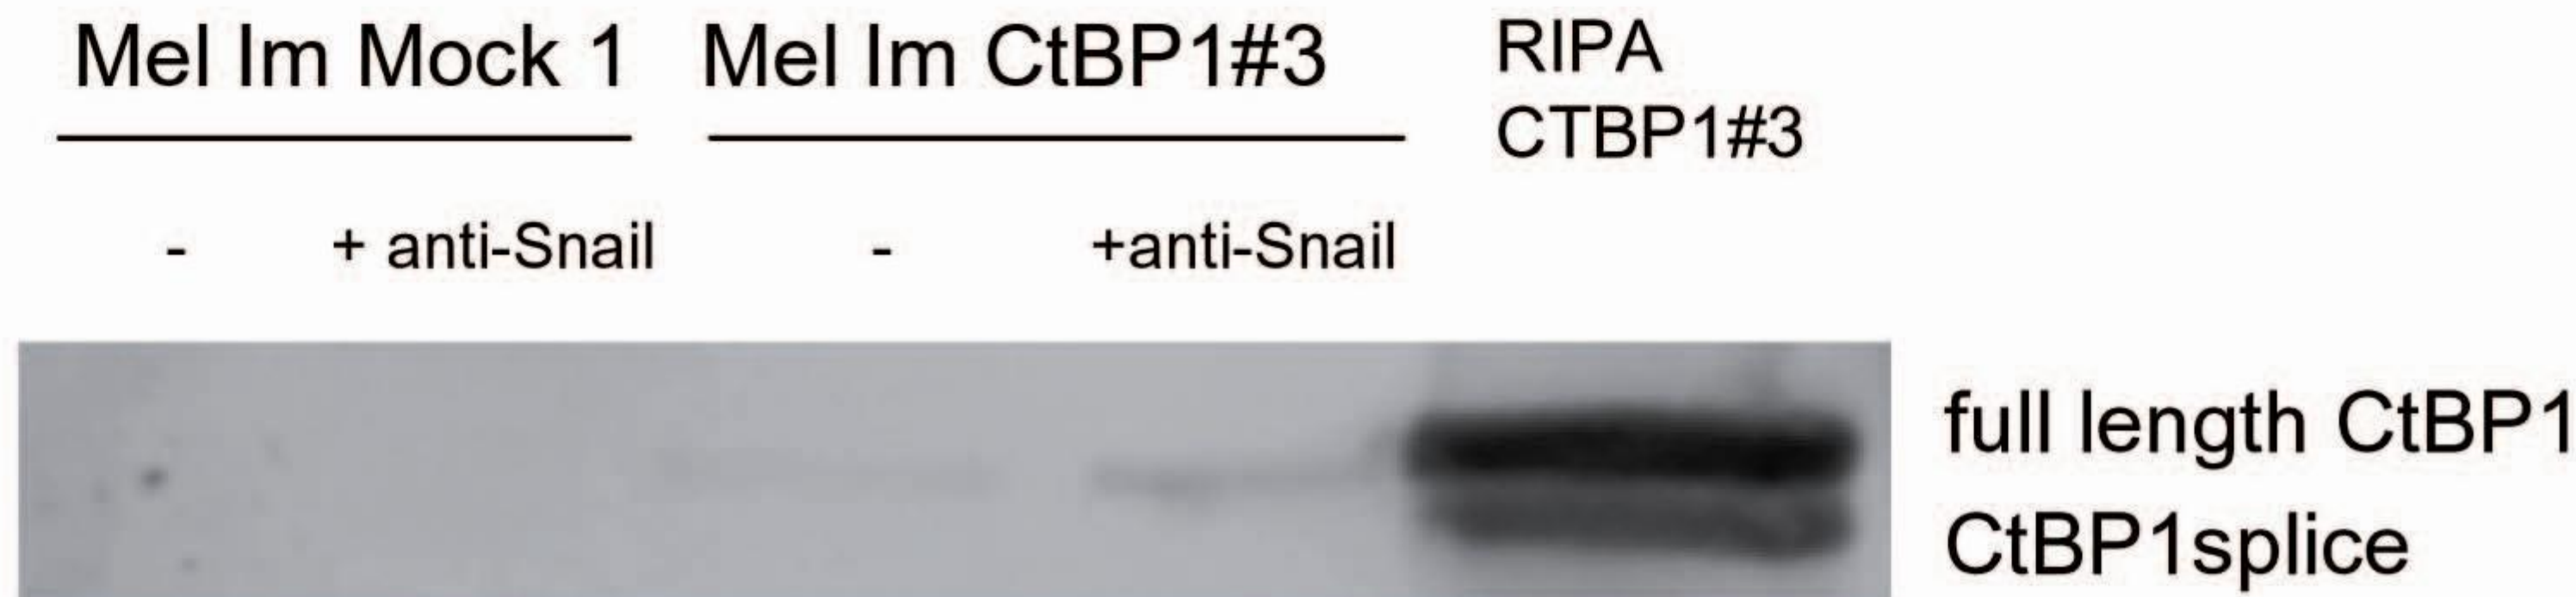

Supplement: MOESM4 [file 9472982]
